# Supplementary material
Source: Springer Nature journal article supplement (https://www.springermedizin.de/resource/supplementary/12986_2012_482_MOESM3_ESM.pdf/25656192)

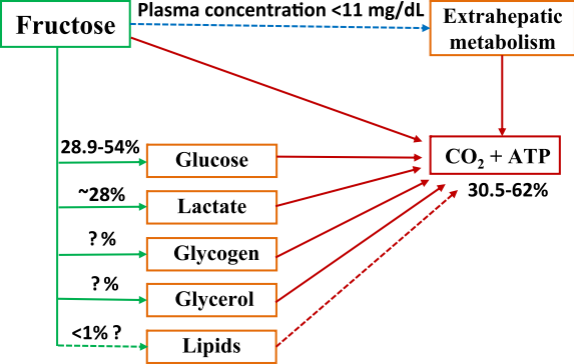

Supplement: MOESM3 [file 25656192]
